# Supplementary material
Source: Research Square preprint supplement (doi:10.21203/rs.3.rs-9564583/v1)
Supplement: Supplementary file 1 [file 86a945823a92d73b7c19ae03.docx]

Supplementary Materials

Supplement to: Pucher G., Kopp, K., Deep, A., et al. (2026): Development and Clinical Validation of a Multimodal AI Framework to Predict Persistent Fever During Antibiotic Therapy in Hospitalized Patients with Cancer

Table of contents

[Supplemental Table 1. Data preprocessing steps 3](#_Toc228205920)

[Supplemental Table 2. Engineered Features derived from clinical covariates. 3](#_Toc228205921)

[Supplemental Table 3. Hyperparameter search spaces for the Logistic Regression baseline model. 7](#_Toc228205922)

[Supplemental Table 4. Performance metric per model during 5-fold nested CV over 20 trials on the UME dataset. 7](#_Toc228205923)

[Supplemental Table 5. Performance metric per model during validation on the holdout UME dataset. 8](#_Toc228205924)

[Supplemental Table 6. Performance metric per model during validation on the pooled St. Josef/Ruhrlandklinik cohort. 8](#_Toc228205925)

[Supplemental Table 7. Performance metric per model during validation on the MIMIC-IV ICU cohort. 9](#_Toc228205926)

[Supplemental Table 8. Top 10 features with highest Permutation Feature Importance values for the multimodal TabPFN model and per dataset. 10](#_Toc228205927)

[Supplemental Table 9. Distributional shift of fever prevalence in the datasets and additional time lagged features after changing the operational definition of the antibiotic reassessment time window 10](#_Toc228205928)

[Supplementary Figure 1. Screenshot of the webapplication used in the clinician validation study 12](#_Toc219223952)

[Supplementary File 1. Tripod+AI Checklist. 13](#_Toc219223952)

**Supplemental Table 1.** Data preprocessing steps

| **Processing step** | **Description** |
| --- | --- |
| Measurement errors | **Body temperature:** Remove data points where or |
| **Heart rate:** Remove data points where or |
| **Mean arterial pressure:** Remove data points where or |
| **Hemoglobin:** Remove data points where or |
| **Serum Creatinine:** Remove data points where or |
| **Pulse Oximetry SpO₂:** Remove data points where or |
| **Bilirubin:** Remove data points where or |
| **Leukocytes:** Remove data points where or |
| **C-reactive Protein:** Remove data points where or |
| Duplicates | Remove redundant records where patient identifier, recorded time and recorded value are identical |
| Missing values (LR model) | Forward-filling of the last observed values within the context window (​); remove time series if no values are included in the prediction window (​) |
| Scaling | Standard scaling of numerical covariates |
| Categorical values | One-hot encoding of categorical covariates |

**Supplemental Table 2.** Engineered Features derived from clinical covariates.

| **Feature** | **Description** | **Datatype** |
| --- | --- | --- |
| cond_hemat | One-hot encoded ICD-10 code for admission diagnosis of other hematological malignancies | boolean |
| cond_leuk | One-hot encoded ICD-10 code for admission diagnosis of leukemia | boolean |
| cond_solid | One-hot encoded ICD-10 code for admission diagnosis of solid tumors | boolean |
| age | Age of patient at admission | integer |
| elixhauser_score | Elixhauser comorbidity score based on ICD-10 codes prior to admission | float |
| sex_male | One-hot encoded if sex of patient is male | boolean |
| length_stay | Length of days from start of hospital stay to first administered antibiotic dosage | float |
| time_lag_1_bt_max | Highest recorded body temperature (°C) 24-48 hours after first administered antibiotic dosage | float |
| time_lag_2_bt_max | Highest recorded body temperature (°C) 0-24 hours after first administered antibiotic dosage | float |
| time_lag_1_bt_mean | Mean recorded body temperature (°C) 24-48 hours after first administered antibiotic dosage | float |
| time_lag_2_bt_mean | Mean recorded body temperature (°C) 0-24 hours after first administered antibiotic dosage | float |
| time_lag_1_krea_max | Highest recorded serum creatinine (mg/dl) 24-48 hours after first administered antibiotic dosage | float |
| time_lag_2_krea_max | Highest recorded serum creatinine (mg/dl) 0-24 hours after first administered antibiotic dosage | float |
| time_lag_1_bili_max | Highest recorded bilirubin (mg/dl) 24-48 hours after first administered antibiotic dosage | float |
| time_lag_2_bili_max | Highest recorded bilirubin (mg/dl) 0-24 hours after first administered antibiotic dosage | float |
| time_lag_1_leua_max | Highest recorded leucocytes (nl) 24-48 hours after first administered antibiotic dosage | float |
| time_lag_2_leua_max | Highest recorded leucocytes (nl) 0-24 hours after first administered antibiotic dosage | float |
| time_lag_1_hb_max  v | Highest recorded hemoglobin (g/dl) 24-48 hours after first administered antibiotic dosage | float |
| time_lag_2_hb_max | Highest recorded hemoglobin (g/dl) 0-24 hours after first administered antibiotic dosage | float |
| time_lag_1_crp_max | Highest recorded CRP (mg/dl) 24-48 hours after first administered antibiotic dosage | float |
| time_lag_2_crp_max | Highest recorded CRP (mg/dl) 0-24 hours after first administered antibiotic dosage | float |
| time_lag_1_hr_max | Highest recorded heart rate (bpm) 24-48 hours after first administered antibiotic dosage | float |
| time_lag_2_hr_max | Highest recorded heart rate (bpm) 0-24 hours after first administered antibiotic dosage | float |
| time_lag_1_map_max | Highest recorded mean arterial pressure (mmHg) 24-48 hours after first administered antibiotic dosage | float |
| time_lag_2_map_max | Highest recorded mean arterial pressure (mmHg) 0-24 hours after first administered antibiotic dosage | float |
| time_lag_1_so2_max | Highest recorded SO2 (%) 24-48 hours after first administered antibiotic dosage | float |
| time_lag_2_so2_max | Highest recorded SO2 (%) 0-24 hours after first administered antibiotic dosage | float |
| fever_variability_lag_1 | Body temperature variability 24-48 hours after first administered antibiotic dosage | float |
| fever_variability_lag_2 | Body temperature variability 0-24 hours after first administered antibiotic dosage | float |
| last_bt_fever_lag_1 | Last body temperature measurement before prediction window | float |
| fever_diff_lag_1 | Difference in body temperature from first to last measured value 24-48 hours after first administered antibiotic dosage | float |
| fever_diff_lag_2 | Difference in body temperature from first to last measured value 0-24 hours after first administered antibiotic dosage | float |
| fever_percent_lag_1 | Percentage of measured body temperatures over fever threshold 24-48 hours after first administered antibiotic dosage | float |
| fever_percent_lag_2 | Percentage of measured body temperatures over fever threshold 0-24 hours after first administered antibiotic dosage | float |
| fever_lag_1_evening | Highest recorded body temperature (°C) during evening hours 24-48 hours after first administered antibiotic dosage | float |
| fever_lag_1_afternoon | Highest recorded body temperature (°C) during afternoon hours 24-48 hours after first administered antibiotic dosage | float |
| fever_lag_1_morning | Highest recorded body temperature (°C) during morning hours 24-48 hours after first administered antibiotic dosage | float |
| fever_lag_2_night | Highest recorded body temperature (°C) during night hours 24-48 hours after first administered antibiotic dosage | float |
| fever_lag_2_evening | Highest recorded body temperature (°C) during evening hours 0-24 hours after first administered antibiotic dosage | float |
| fever_lag_2_afternoon | Highest recorded body temperature (°C) during afternoon hours 0-24 hours after first administered antibiotic dosage | float |
| fever_lag_2_morning | Highest recorded body temperature (°C) during morning hours 0-24 hours after first administered antibiotic dosage | float |
| fever_lag_2_night | Highest recorded body temperature (°C) during night hours 0-24 hours after first administered antibiotic dosage | float |
| fever_points_lag_1 | Number of body temperature recordings 24-48 hours after first administered antibiotic dosage | integer |
| fever_points_lag_2 | Number of body temperature recordings 0-24 hours after first administered antibiotic dosage | integer |
| fever_change_lag_1 | Change rate of measured body temperatures 24-48 hours after first administered antibiotic dosage | float |
| fever_change_lag_all | Change rate of measured body temperatures 0-48 hours after first administered antibiotic dosage | float |
| fever_range_lag_1 | Range of measured body temperatures 24-48 hours after first administered antibiotic dosage | float |
| fever_range_lag_2 | Range of measured body temperatures 0-24 hours after first administered antibiotic dosage | float |
| trend | Trend of measured body temperatures 0-48 hours after first administered antibiotic dosage | float |
| skewness_lag_all | Skewness of measured body temperatures 0-48 hours after first administered antibiotic dosage | float |
| fourier_max_magnitude | Maximum fourier transform magnitude of body temperatures 0-48 hours after first administered antibiotic dosage | float |
| predictions_max | Chronos-2 based forecasted highest body temperature 48-72 hours after first administered antibiotic dosage | float |
| documented_infection | true = a bacterial/fungal/viral infection is documented or strongly clinically diagnosed/suspected in the notes.  false = notes explicitly suggest no infection / no evidence of infection. | boolean |
| documented_resistence | true = microbiology or clinical documentation mentions antimicrobial resistance / reduced susceptibility (e.g., MRSA, ESBL, VRE, resistant organism).  false = no resistance documented. | boolean |
| clinical_impression | Global clinical status during the relevant period (0-48h after antibiotic start, if inferable).  1 = fairly okay / clinically stable / not severely ill.  2 = bad / clinically ill / concerning deterioration or severe condition. | integer |
| probability_of_persisting_fever | Note-based estimate of whether fever will still persist >48h after antibiotic start.  1 = low likelihood  2 = high likelihood | integer |
| probability_icu | note-based estimate of likelihood of ICU transfer/escalation.  1 = low likelihood  2 = high likelihood | integer |
| ab_change | Any documented change in antibiotic regimen during the encounter/relevant period, including start, stop, switch, escalation, de-escalation, or replacement.  true = any such change documented  false = no antibiotic change documented | boolean |
| pathogen_identified | true = a specific pathogen organism is documented from culture/PCR/etc. (not just "infection")  false = no pathogen identified/documented | boolean |
| abx_escalation_due_to_failure | true = antibiotics were escalated/switched specifically due to persistent fever, clinical worsening, treatment failure, or microbiology results  false = no such failure-driven escalation documented | boolean |
| neutropenia | true = neutropenia documented/suspected (including febrile neutropenia context)  false = neutropenia not documented | boolean |
| profound_immunosuppression | true = strong immunosuppression documented (e.g., intensive chemotherapy, high-dose steroids, transplant, severe immune suppression)  false = no strong immunosuppression documented | boolean |
| noninfectious_fever_suspected | true = notes favor/consider noninfectious fever cause (e.g., tumor fever, drug fever, thromboembolism, inflammatory cause)  false = no noninfectious cause suspected/documented | boolean |
| diagnostic_uncertainty_high | true = clinicians document unclear source/etiology, broad differential, ongoing search, uncertain diagnosis  false = diagnosis/source appears reasonably clear in notes | boolean |
| empiric_abx_adequate | Clinical judgment from notes whether empiric antibiotics likely covered the suspected pathogen/source.  true = notes suggest coverage appropriate/effective  false = notes suggest mismatch, insufficient coverage, or ineffective regimen | boolean |
| source_control_needed | true = notes suggest infection source likely requires procedural/surgical control (e.g., drainage, debridement, line removal, biliary intervention)  false = no such source control need documented | boolean |
| clinical_trajectory_0_48h_improving | true = symptoms/signs/labs/overall status improving  false = symptoms/signs/labs/overall status not improving | boolean |
| infection_focus_intraabdominal | Main documented/suspected infection source.  true = intra-abdominal source (abscess, biliary, GI etc.)  false = no intra-abdominal source (abscess, biliary, GI etc.) | boolean |
| infection_focus_pneumonia | Main documented/suspected infection source.  true = pulmonary infection/pneumonia  false = no pulmonary infection/pneumonia | boolean |
| infection_focus_unknown | Main documented/suspected infection source.  true = no clear focus  false = focus exists and known | boolean |
| sepsis_or_shock_sepsis | Main documented/suspected infection source.  true = sepsis documented/suspected without shock  false = no sepsis documented/suspected without shock | boolean |
| focal_consolidation | true = focal airspace consolidation is present  false = no focal consolidation visible | boolean |
| ground_glass_opacities | true = ground-glass opacities are present  false = no ground-glass opacities visible | boolean |
| pulmonary_nodules | true = one or more pulmonary nodules are visible  false = no pulmonary nodules visible | boolean |
| halo_or_reversed_halo_sign | true = halo sign OR reversed-halo sign is present  false = neither sign visible | boolean |
| pleural_effusion | true = pleural effusion is present  false = no pleural effusion visible | boolean |

**Supplemental Table 3.** Hyperparameter search spaces for the Logistic Regression baseline model.

| Model | Hyperparameter | Range |
| --- | --- | --- |
| Logistic Regression | C | {10-4, ..., 10} (log scale) |
|  | penalty | [l1, l2, elasticnet] (categorical) |
|  | l1_ratio | {0, ..., 1} (uniform) |

**Supplemental Table 4.** Performance metric per model during 5-fold nested CV over 20 trials on the UME dataset. UME = University Medicine Essen; LR = Regularized logistic regression; Qwen zero = Qwen-3-Next-80B in zero-shot setting; Qwen few = Qwen-3-Next-80B in few-shot setting; TPFN tab = TabPFN with tabular data only, TPFN multi = TabPFN with multimodal data.

| Metric | Naive | LR | TPFN tab | TPFN multi | Qwen zero | Qwen few |
| --- | --- | --- | --- | --- | --- | --- |
| **Discrimination** |  |  |  |  |  |  |
| AUROC (95% CI) | 0.67 (0.64-0.70) | 0.74 (0.71-0.77) | 0.78 (0.76-0.81) | 0.84 (0.81-0.86) | - | - |
| AUPRC (95% CI) | 0.71 (0.67-0.75) | 0.77 (0.73-0.81) | 0.81 (0.77-0.85) | 0.85 (0.82-0.89) | - | - |
| **Calibration** |  |  |  |  |  |  |
| Calibration intercept (95% CI) | 0.23 (0.10-0.35) | 0.01 (-0.11-0.14) | 0.02 (-0.13–0.16) | -0.01 (- 0.17-0.15) | - | - |
| Calibration slope (95% CI) | 1.12 (0.89-1.37 | 1.23 (1.01-1.48) | 0.90 (0.78–1.03) | 0.98 (0.87-1.11) | - | - |
| Brier score (95% CI) | 0.23 (0.22-0.24) | 0.21 (0.20-0.22) | 0.19 (0.18–0.20) | 0.16 (0.15-0.18) | - |  |
| **Threshold-based metrics** |  |  |  |  |  |  |
| Sensitivity (95% CI) | 0.59 (0.55-0.63) | 0.73 (0.69-0.76) | 0.77 (CI 0.74-0.80) | 0.80 (0.77-0.84) | 0.47 (0.42-0. 50) | 0.47 (0.43-0.51) |
| Specificity (95% CI) | 0.66 (0.62-0.70) | 0.62 (0.57-0.66) | 0.63 (CI 0.59-0.68) | 0.71 (0.66-75) | 0.74 (0.70- 77) | 0.74 (0.70-0.77) |
| PPV (95% CI) | 0.68 (0.64-0.72) | 0.71 (0.67-0.74) | 0.72 (CI 0.69-0.76) | 0.77 (0.74-0.78) | 0.69 (0.65-0.74) | 0.70 (0.66-0.74) |
| NPV (95% CI) | 0.56 (0.52-0.60) | 0.64 (0.60-0.69) | 0.69 (CI 0.64-0.73) | 0.74 (0.70-78) | 0.53 (0.49-0.57) | 0.53 (0.50-0.57) |
| F1 score (95% CI) | 0.63 (0.60-0.66) | 0.72 (0.69-0.74) | 0.75 (CI 0.72-0.77) | 0.79 (0.76-0.81) | 0.56 (0.52-0.60) | 0.56 (0.53-0.60) |
| Accuracy (95% CI) | 0.62 (0.59-65) | 0.68 (0.65-0.71) | 0.71 (CI 0.68-0.74) | 0.76 (0.73-0.79) | 0.59 (0.56-0.62) | 0.60 (0.56-0.63) |

**Supplemental Table 5.** Performance metric per model during validation on the holdout UME dataset. UME = University Medicine Essen; LR = Regularized logistic regression; Qwen zero = Qwen-3-Next-80B in zero-shot setting; Qwen few = Qwen-3-Next-80B in few-shot setting; TPFN tab = TabPFN with tabular data only, TPFN multi = TabPFN with multimodal data.

| Metric | Naive | LR | TPFN tab | TPFN multi | Qwen zero | Qwen few |
| --- | --- | --- | --- | --- | --- | --- |
| **Discrimination** |  |  |  |  |  |  |
| AUROC (95% CI) | 0.65 (0.59-0.71) | 0.76 (0.71-0.82) | 0.77 (0.72-0.82) | 0.82 (0.77-0.87) | - | - |
| AUPRC (95% CI) | 0.65 (0.57-0.73) | 0.75 (0.67-0.82) | 0.76 (0.68-0.83) | 0.81 (0.73-0.88) | - | - |
| **Calibration** |  |  |  |  |  |  |
| Calibration intercept (95% CI) | -0.04 (-0.27-0.19) | -0.25 (-0.53-0.00) | -0.28 (-0.57--0.01) | -0.38 (-0.68--0.09) | - | - |
| Calibration slope (95% CI) | 0.35 (0.03-0.87) | 0.70 (0.50-0.92) | 0.76 (0.56-0.97) | 1.00 (0.76-1.30) | - | - |
| Brier score (95% CI) | 0.24 (0.22-0.26) | 0.20 (0.18-0.23) | 0.20 (0.17-0.23) | 0.18 (0.15-0.20) | - | - |
| **Threshold-based metrics** |  |  |  |  |  |  |
| Sensitivity (95% CI) | 0.62 (0.54-0.70) | 0.76 (0.70-0.83) | 0.77 (0.70-0.84) | 0.81 (0.74-0.87) | 0.43 (0.37-0.50) | 0.43 (0.36-0.50) |
| Specificity (95% CI) | 0.58 (0.50-0.66) | 0.66 (0.58-0.73) | 0.69 (0.61-0.77) | 0.76 (0.69-0.83) | 0.78 (0.70-0.85) | 0.79 (0.72-0.86) |
| PPV (95% CI) | 0.60 (0.52-0.68) | 0.69 (0.62-0.76) | 0.71 (0.64–0.79) | 0.76 (0.69-0.83) | 0.66 (0.56-0.76) | 0.68 (0.57–0.78) |
| NPV (95% CI) | 0.60 (0.52-0.68) | 0.74 (0.66-0.81) | 0.75 (0.67–0.82) | 0.79 (0.72-0.85) | 0.58 (0.52-0.65) | 0.58 (0.52–0.66) |
| F1 score (95% CI) | 0.61 (0.54-0.67) | 0.73 (0.67-0.78) | 0.74 (0.67–0.81) | 0.78 (0.73-0.83) | 0.52 (0.45-0.60) | 0.53 (0.45-0.61) |
| Accuracy (95% CI) | 0.60 (0.54-0.65) | 0.71 (0.66-0.76) | 0.73 (0.66–0.81) | 0.79 (0.0.74-0.84) | 0.61 (0.54-0.68) | 0.61 (0.55-0.68) |

**Supplemental Table 6.** Performance metric per model during validation on the pooled St. Josef/Ruhrlandklinik cohort. LR = Regularized logistic regression; Qwen zero = Qwen-3-Next-80B in zero-shot setting; Qwen few = Qwen-3-Next-80B in few-shot setting; TPFN tab = TabPFN with tabular data only, TPFN multi = TabPFN with multimodal data.

| Metric | Naive | LR | TPFN tab | TPFN multi | Qwen zero | Qwen few |
| --- | --- | --- | --- | --- | --- | --- |
| **Discrimination** |  |  |  |  |  |  |
| AUROC (95% CI) | 0.59 (0.52-0.66) | 0.69 (0.62-0.75) | 0.72 (0.65-0.78) | 0.75 (0.69-0.81) | - | - |
| AUPRC (95% CI) | 0.55 (0.45-0.64) | 0.64 (0.55-0.73) | 0.70 (0.60-0.77) | 0.73 (0.64-0.80) | - | - |
| **Calibration** |  |  |  |  |  |  |
| Calibration intercept (95% CI) | -0.26 (-0.51--0.02) | -0.47 (-0.76–-0.20) | -0.44 (-0.74–-0.17) | -0.21 (-0.48-0.06) | - | - |
| Calibration slope (95% CI) | 0.16 (-0.04-0.54) | 0.42 (0.25–0.59) | 0.62 (0.38–0.87) | 0.69 (0.47–0.93) | - | - |
| Brier score (95% CI) | 0.25 (0.23-0.28) | 0.25 (0.22–0.29) | 0.23 (0.20–0.26) | 0.20 (0.18–0.23) | - | - |
| **Threshold-based metrics** |  |  |  |  |  |  |
| Sensitivity (95% CI) | 0.50 (0.41-0.60) | 0.70 (0.61-0.78) | 0.76 (0.68- 0.83) | 0.73 (0.64-0.81) | 0.54 (0.45-0.63) | 0.54 (0.44-0.63) |
| Specificity (95% CI) | 0.58 (0.51-0.66) | 0.58 (0.50-0.66) | 0.62 (0.54- 0.70) | 0.71 (0.64-0.79) | 0.69 (0.61-0.76) | 0.68 (0.60-0.75) |
| PPV (95% CI) | 0.48 (0.39-0.57) | 0.56 (0.48-0.64) | 0.61 (0.52-0.67) | 0.66 (0.57-0.74) | 0.57 (0.47-0.66) | 0.56 (0.47-0.66) |
| NPV (95% CI) | 0.60 (0.52-0.68) | 0.71 (0.63-0.79) | 0.77 (0.69-84) | 0.77 (0.69-84) | 0.66 (0.59-0.74) | 0.66 (0.59-0.73) |
| F1 score (95% CI) | 0.49 (0.41-0.57) | 0.62 (0.55-0.69) | 0.67 (0.58-0.75) | 0.69 (0.61-0.77) | 0.55 (0.47-0.63) | 0.55 (0.46-0.62) |
| Accuracy (95% CI) | 0.55 (0.49-0.61) | 0.63 (0.57-0.69) | 0.68 (0.60-0.76) | 0.72 (0.64-0.80) | 0.62 (0.56-0.68) | 0.62 (0.56-0.68) |

**Supplemental Table 7.** Performance metric per model during validation on the MIMIC-IV ICU cohort. LR = Regularized logistic regression; Qwen zero = Qwen-3-Next-80B in zero-shot setting; Qwen few = Qwen-3-Next-80B in few-shot setting; TPFN tab = TabPFN with tabular data only, TPFN multi = TabPFN with multimodal data.

| Metric | Naive | LR | TPFN tab | TPFN multi | Qwen zero | Qwen few |
| --- | --- | --- | --- | --- | --- | --- |
| **Discrimination** |  |  |  |  |  |  |
| AUROC (95% CI) | 0.70 (0.66-0.74) | 0.71 (0.67-0.75) | 0.75 (0.72-0.79) | 0.79 (0.76-0.83) | - | - |
| AUPRC (95% CI) | 0.68 (0.63-0.73) | 0.65 (0.61-0.69) | 0.72 (0.68-0.77) | 0.72 (0.67-0.77) | - | - |
| **Calibration** |  |  |  |  |  |  |
| Calibration intercept (95% CI) | -0.05 (-0.19-0.09) | -0.06 (-0.59-0.47) | -0.57 (-0.75--0.41) | -0.08 (-0.23-0.08 | - | - |
| Calibration slope (95% CI) | 1.14 (0.86-1.45) | 0.97 (0.44-1.55) | 0.84 (0.71-0.97) | 0.73 (0.61-0.85) | - | - |
| Brier score (95% CI) | 0.22 (0.21-0.23) | 0.22 (0.21-0.23) | 0.22 (0.20-0.23) | 0.19 (0.18-0.21) | - | - |
| **Threshold-based metrics** |  |  |  |  |  |  |
| Sensitivity (95% CI) | 0.60 (0.55-0.65) | 0.83 (0.79-0.87) | 0.68 (0.63-0.73) | 0.70 (0.65-0.74) | 0.71 (0.66-0.75) | 0.80 (0.76-0.82) |
| Specificity (95% CI) | 0.72 (0.68-0.77) | 0.50 (0.46-0.55) | 0.73 (0.68-0.77) | 0.75 (0.71-0.79) | 0.40 (0.36-0.45) | 0.43(0.38-0.47) |
| PPV (95% CI) | 0.65 (0.60-0.70) | 0.59 (0.56-0.62) | 0.68 (CI 0.63-0.73) | 0.71 (0.66-0.75) | 0.50 (0.46-0.55) | 0.54 (0.51-0.57) |
| NPV (95% CI) | 0.68 (0.64-0.72) | 0.78 (0.73-0.83) | 0.73 (0.69-0.77) | 0.74 (0.70-0.78) | 0.62 (0.56-0.67) | 0.72 (0.67-0.76) |
| F1 score (95% CI) | 0.62 (0.58-0.66) | 0.69 (0.66-0.73) | 0.68 (0.64-0.71) | 0.70 (0.66-0.74) | 0.59 (0.55-0.63) | 0.64 (0.61-0.67) |
| Accuracy (95% CI) | 0.66 (0.63-0.70) | 0.65 (0.61-0.69) | 0.70 (CI 0.67-0.73) | 0.73 (0.70-0.76) | 0.54 (0.51-0.58) | 0.60 (0.56-0.63) |

**Supplemental Table 8.** Top 10 features with highest Permutation Feature Importance values for the multimodal TabPFN model and per dataset. For feature descriptions, see Supplemental Table 2. UME = University Medicine Essen.

| Model | UME Top 10 Permutation Feature Importance, AUC (95% CI) | | UME holdout 10 Permutation Feature Importance, AUC (95% CI) | |
| --- | --- | --- | --- | --- |
| TabPFN multi-modal | predictions_max | 0.062 (0.028-0.092) | predictions_max | 0.048 (0.003-0.091) |
| last_bt_fever_lag_1 | 0.022 (0.004-0.045) | time_lag_1_leua_max | 0.033 (0.002-0.061) |
| time_lag_1_bt_max | 0.012 (-0.013-0.035) | time_lag_2_leua_max | 0.013 (0.000-0.030) |
| time_lag_1_leua_max | 0.009 (-0.006-0.039) | time_lag_1_bt_max | 0.011 (-0.002-0.025) |
| fever_points_lag_1 | 0.008 (-0.006-0.026) | last_bt_fever_lag_1 | 0.011 (-0.004-0.022) |
| time_lag_2_leua_max | 0.007 (-0.010-0.025) | fever_percent_lag_1 | 0.002 (-0.005-0.020) |
| time_lag_1_bt_mean | 0.004 (-0.009-0.022) | fever_points_lag_1 | 0.001 (-0.001-0.004) |
| fever_percent_lag_1 | 0.002 (-0.017-0.015) | fever_variability_lag_1 | 0.001 (-0.002-0.006) |
| time_lag_2_bili_max | 0.002 (-0.008-0.014) | pathogen_identified | 0.001 (-0.001-0.001) |
| fever_variability_lag_1 | 0.001 (-0.003-0.006) | profound_immunosuppression | 0.001 (0.000-0.001) |
|  | St. Josef/Ruhrlandklinik Top 10 Permutation Feature Importance, AUC (95% CI) | | MIMIC-IV ICU Top 10 Permutation Feature Importance, AUC (95% CI) | |
| TabPFN multi-modal | predictions_max | 0.055 (0.002-0.111) | predictions_max | 0.080 (0.057-0.106) |
| time_lag_1_bt_max | 0.028 (0.016-0.042) | time_lag_2_leua_max | 0.014 (0.001-0.029) |
| time_lag_2_leua_max | 0.013 (0.000-0.031) | last_bt_fever_lag_1 | 0.014 (0.009-0.020) |
| time_lag_2_bt_max | 0.004 (0.000-0.008) | fever_percent_lag_1 | 0.011 (0.005-0.017) |
| time_lag_1_leua_max | 0.002 (-0.010-0.014) | time_lag_1_bt_max | 0.010 (0.005-0.017) |
| fever_range_lag_2 | 0.002 (0.000-0.003) | time_lag_1_leua_max | 0.004 (0.000-0.009) |
| fever_variability_lag_2 | 0.001 (0.000-0.002) | time_lag_2_bili_max | 0.002 (0.000-0.004) |
| fever_lag_2_evening | 0.001 (0.000-0.002) | fever_change_lag_1 | 0.001 (0.000-0.002) |
| time_lag_1_crp_max | 0.001 (0.000-0.002) | fever_diff_lag_1 | 0.001 (0.000-0.002) |
| noninfectious_fever_suspected | 0.001 (0.000-0.002) | time_lag_1_bt_mean | 0.001 (-0.003-0.005) |

**Supplemental Table 9.** Distributional shift of fever prevalence in the datasets and additional time lagged features after changing the operational definition of the antibiotic reassessment time window from 48-72 hours to 72-96 hours after start of antibiotics

| **Cohort** | **Fever prevalence, 72-96 hours after start of antibiotics, n (%)** |
| --- | --- |
| UME, training | 441 (43.53) |
| UME, holdout | 116 (40.99) |
| Ruhrlandklinik/St. Josef, pooled | 86 (35.01) |
| MIMIC-IV ICU | 254 (37.78) |
| **Additional time lagged features** | **Description** |
| time_lag_3_bt_max | Highest recorded body temperature (°C) 48-72 hours after first administered antibiotic dosage |
| time_lag_3_bt_mean | Mean recorded body temperature (°C) 48-72 hours after first administered antibiotic dosage |
| time_lag_3_krea_max | Highest recorded serum creatinine (mg/dl) 48-72 hours after first administered antibiotic dosage |
| time_lag_3_bili_max | Highest recorded bilirubin (mg/dl) 48-72 hours after first administered antibiotic dosage |
| time_lag_3_leua_max | Highest recorded leucocytes (nl) 48-72 hours after first administered antibiotic dosage |
| time_lag_3_hb_max  v | Highest recorded hemoglobin (g/dl) 48-72 hours after first administered antibiotic dosage |
| time_lag_3_crp_max | Highest recorded CRP (mg/dl) 48-72 hours after first administered antibiotic dosage |
| fever_variability_lag_3 | Body temperature variability 48-72 hours after first administered antibiotic dosage |
| fever_diff_lag_3 | Difference in body temperature from first to last measured value 48-72 hours after first administered antibiotic dosage |
| fever_percent_lag_3 | Percentage of measured body temperatures over fever threshold 48-72 hours after first administered antibiotic dosage |
| fever_lag_3_evening | Highest recorded body temperature (°C) during evening hours 48-72 hours after first administered antibiotic dosage |
| fever_lag_3_afternoon | Highest recorded body temperature (°C) during afternoon hours 48-72 hours after first administered antibiotic dosage |
| fever_lag_3_morning | Highest recorded body temperature (°C) during morning hours 48-72 hours after first administered antibiotic dosage |
| fever_lag_3_night | Highest recorded body temperature (°C) during night hours 48-72 hours after first administered antibiotic dosage |
| fever_points_lag_3 | Number of body temperature recordings 48-72 hours after first administered antibiotic dosage |
| fever_change_lag_3 | Change rate of measured body temperatures 48-72 hours after first administered antibiotic dosage |
| fever_change_lag_all | Change rate of measured body temperatures 0-72 hours after first administered antibiotic dosage |
| fever_range_lag_3 | Range of measured body temperatures 48-72 hours after first administered antibiotic dosage |
| trend | Trend of measured body temperatures 0-72 hours after first administered antibiotic dosage |
| skewness_lag_all | Skewness of measured body temperatures 0-72 hours after first administered antibiotic dosage |
| fourier_max_magnitude | Maximum fourier transform magnitude of body temperatures 0-72 hours after first administered antibiotic dosage |
| predictions_max | Chronos-2 based forecasted highest body temperature 72-96 hours after first administered antibiotic dosage |


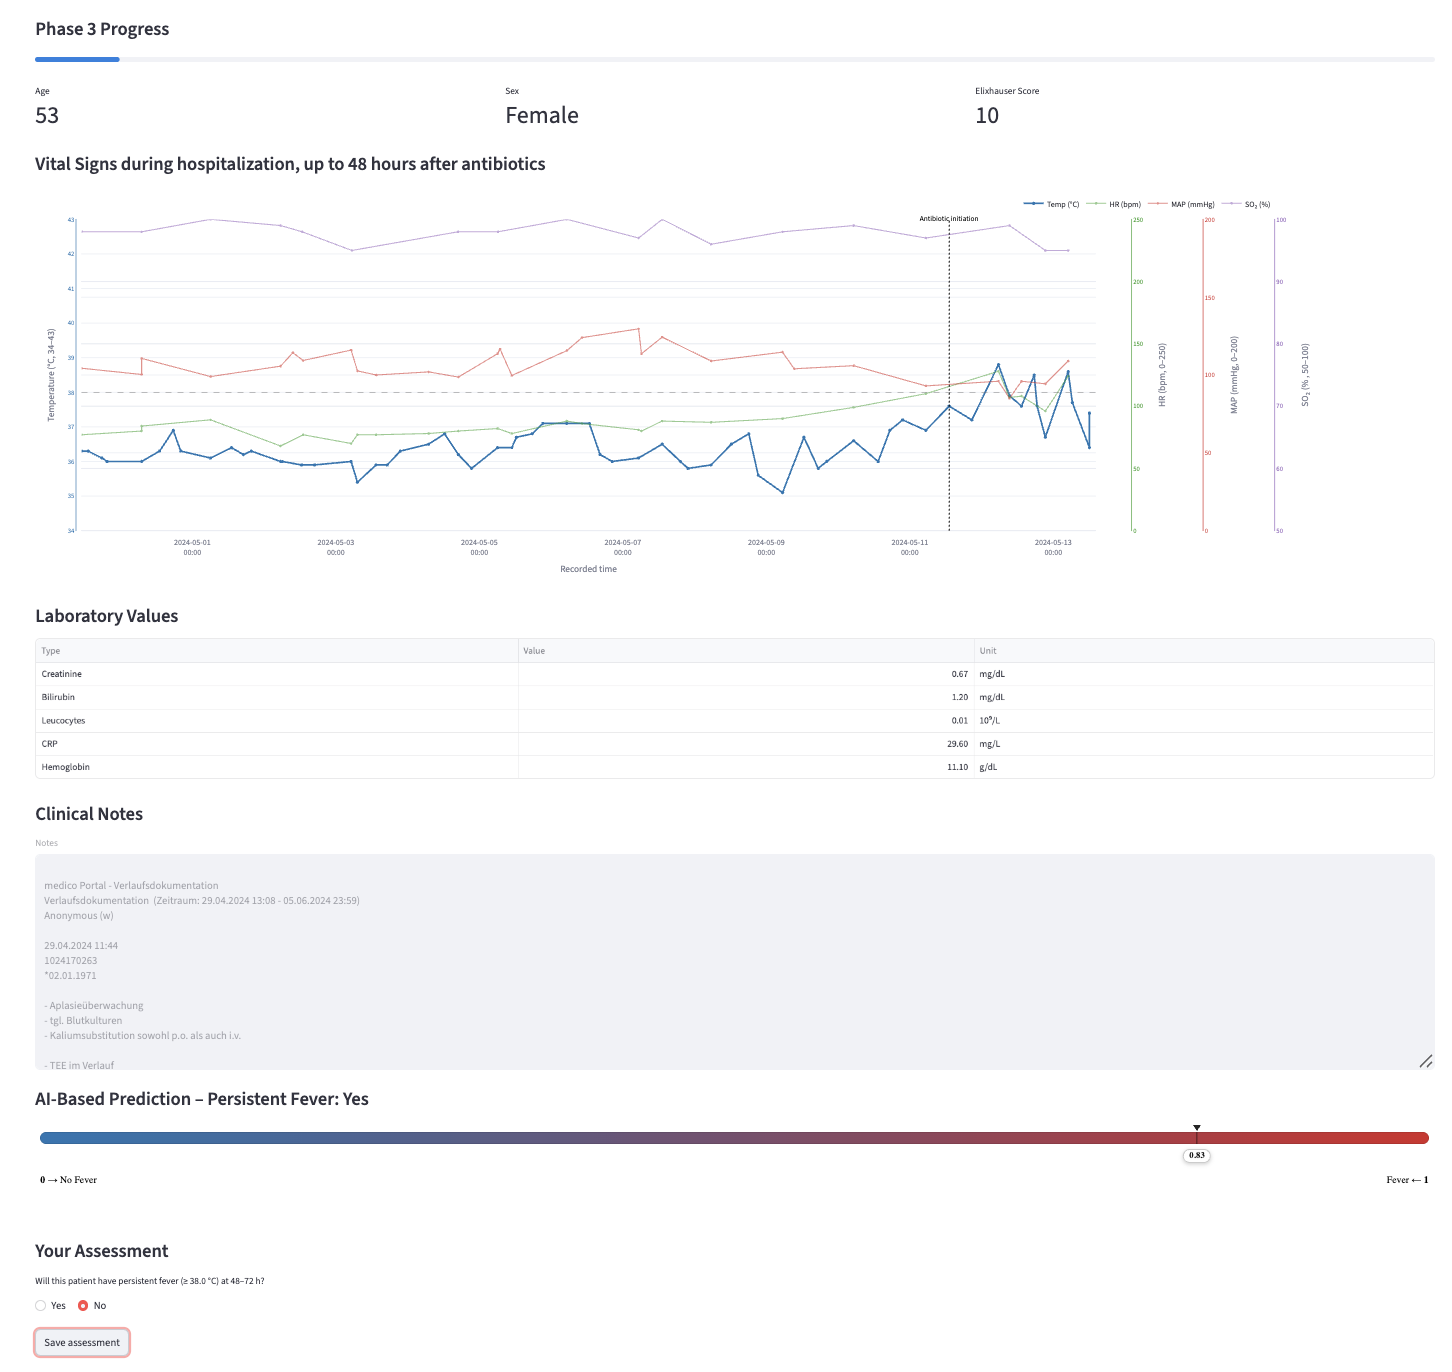


**Supplemental Figure 1.** Screenshot of the web application used in the clinician validation study.


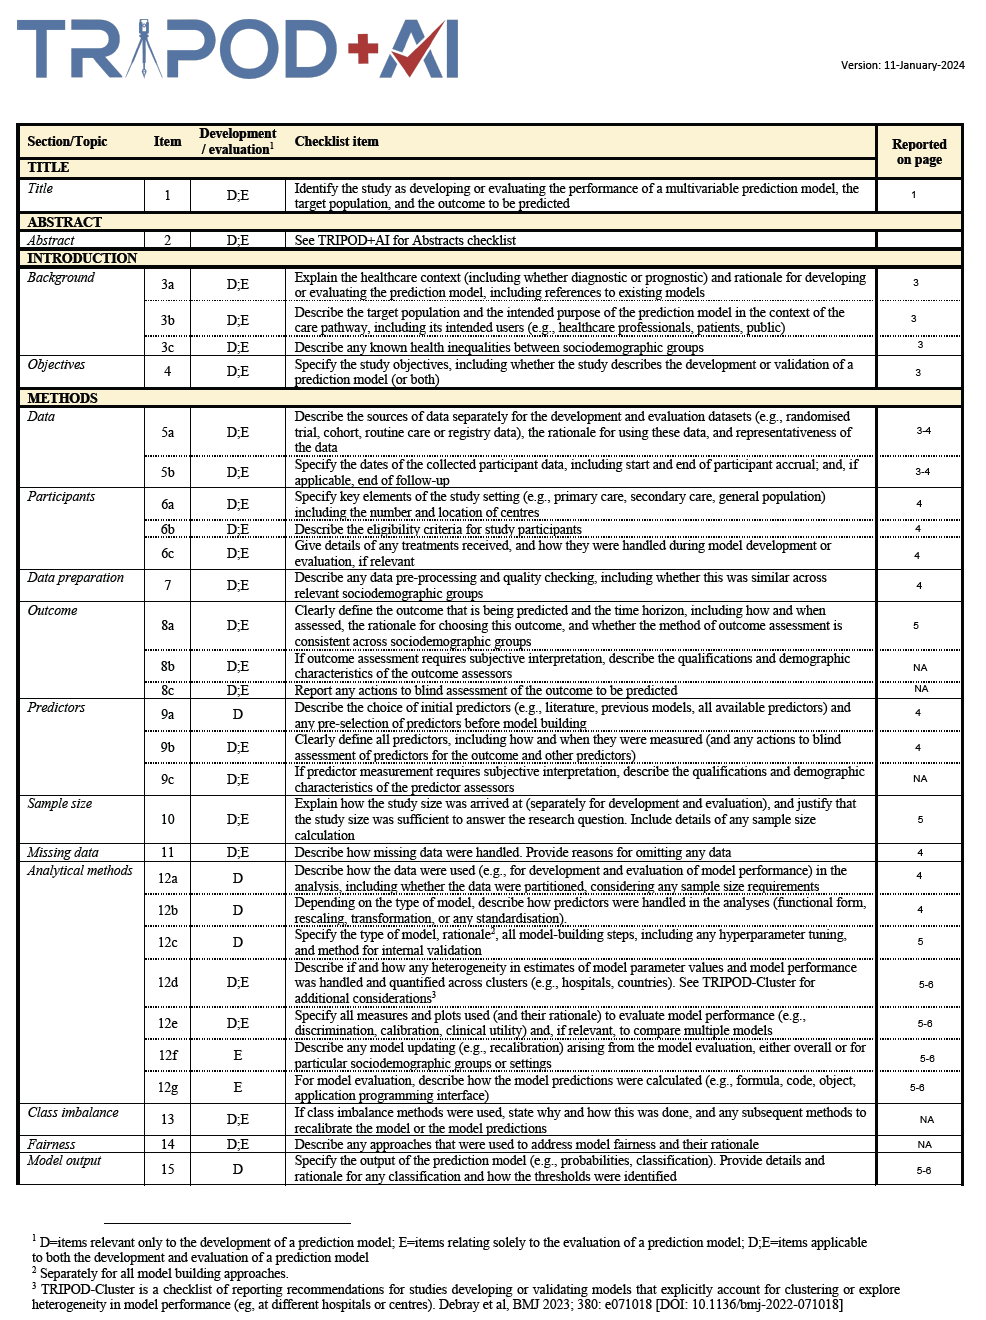


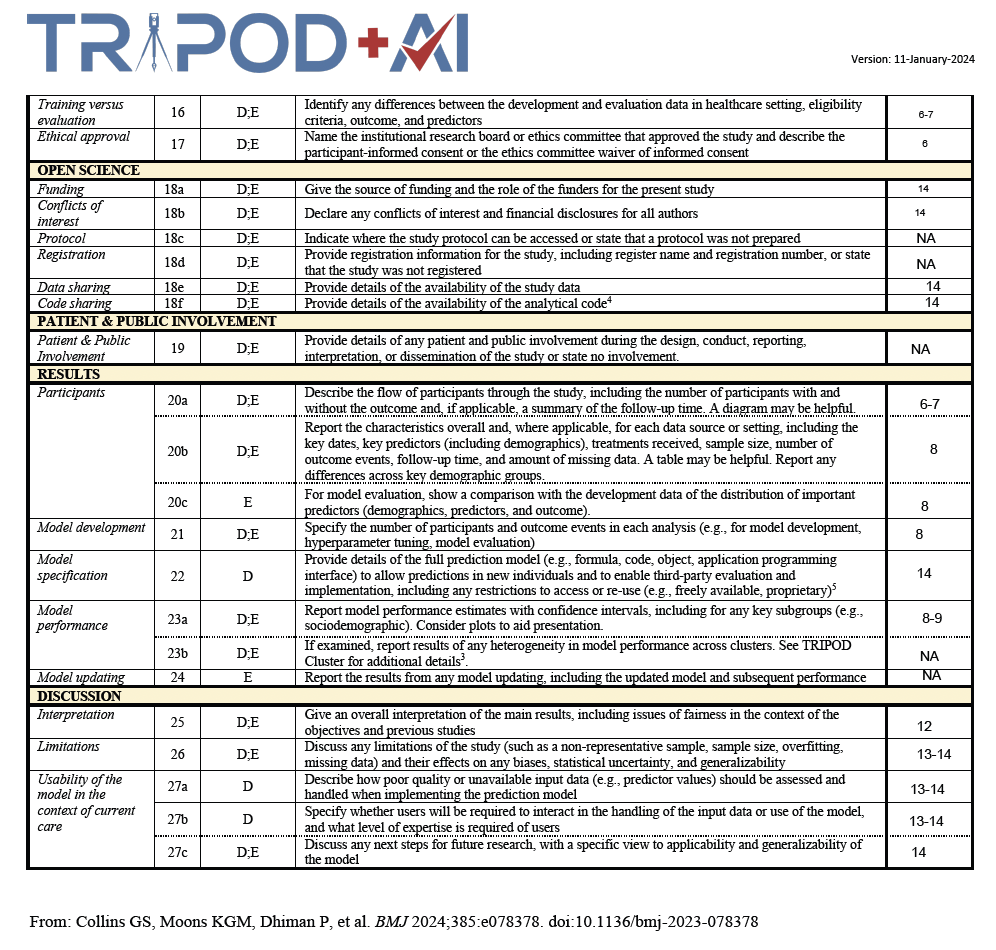


**Supplemental File 1.** Tripod+AI Checklist.
